# Supplementary material for: Fine-tuning of organic optical double-donor NLO chromophores with DA-supported functional groups
Source: Royal Society of Chemistry journal article supplement (doi:10.1039/d3ra08246f), 2024-01-01

## Supporting information

### Fine tuning of Organic Optical Double donor NLO chromophore with DA supported functional groups

Abdul Rahman <sup>a,b,c,d</sup>, Shuhui Bo <sup>c,d</sup> \*\*, Amjad Ali <sup>e</sup>, Lian Zhang <sup>f</sup>, Suliman  
Yousef Alomer <sup>g</sup> and Fenggang Liu<sup>f\*</sup>

#### UV-Analysis:

In all solvents:

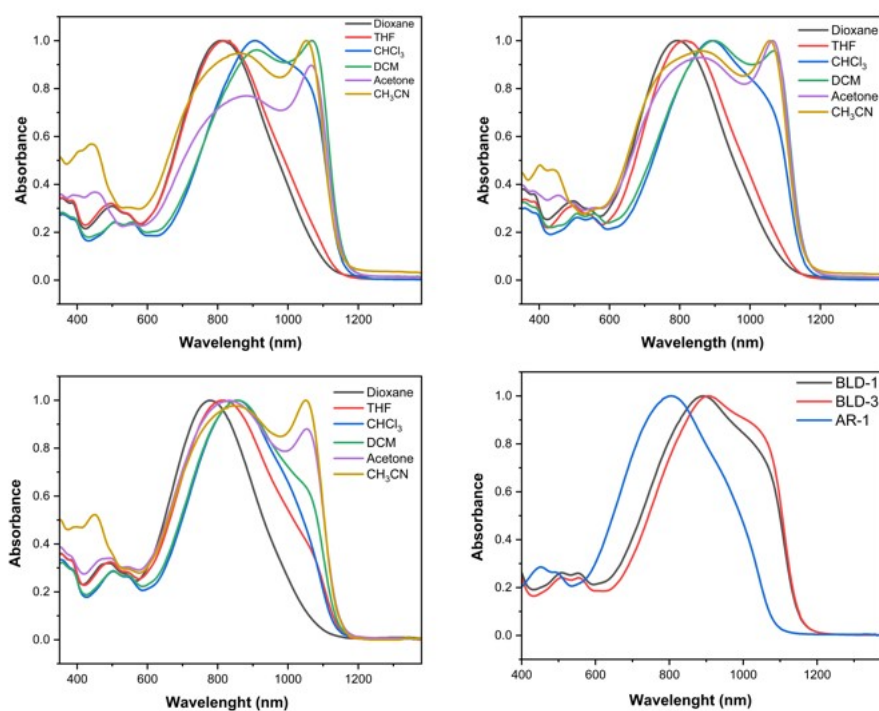

In film:

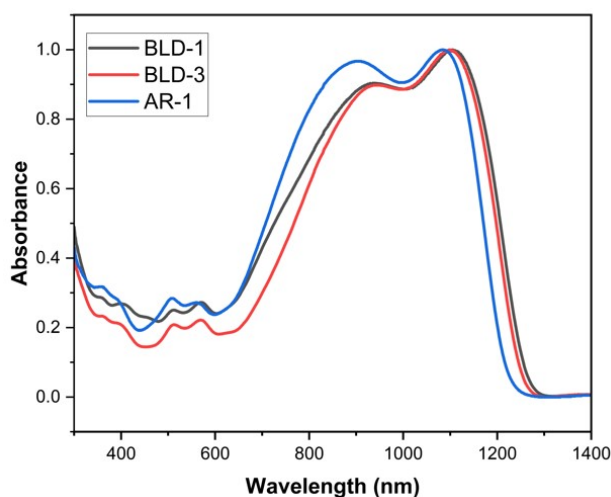

**TGA analysis:**

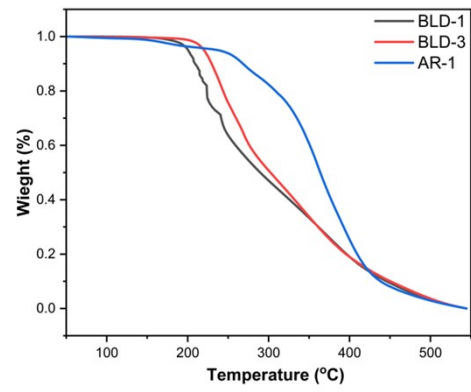

## NMR Data:

### $^1\text{H}$ NMR and $^{13}\text{C}$ of 3b:

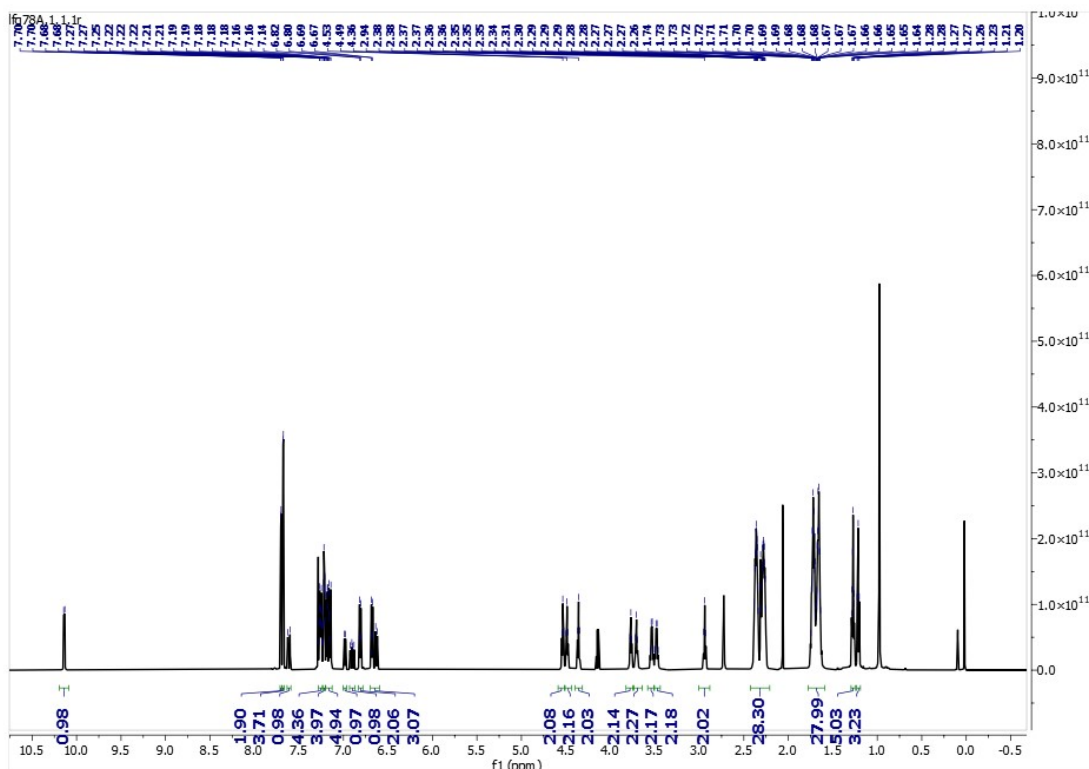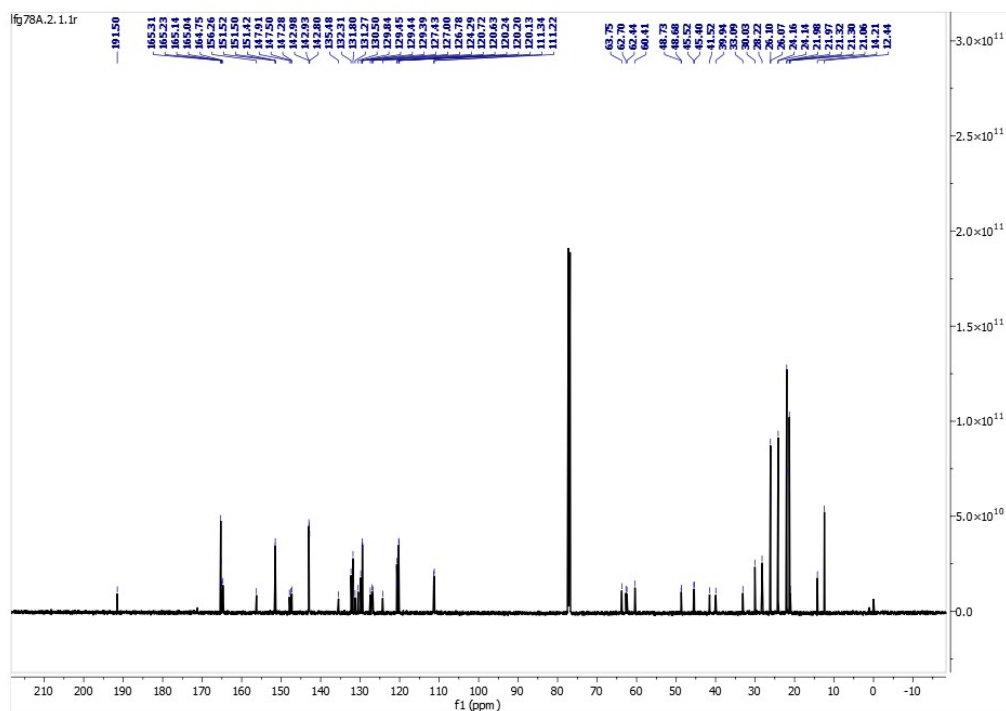

# <sup>1</sup>H NMR and <sup>13</sup>C of AR-1:

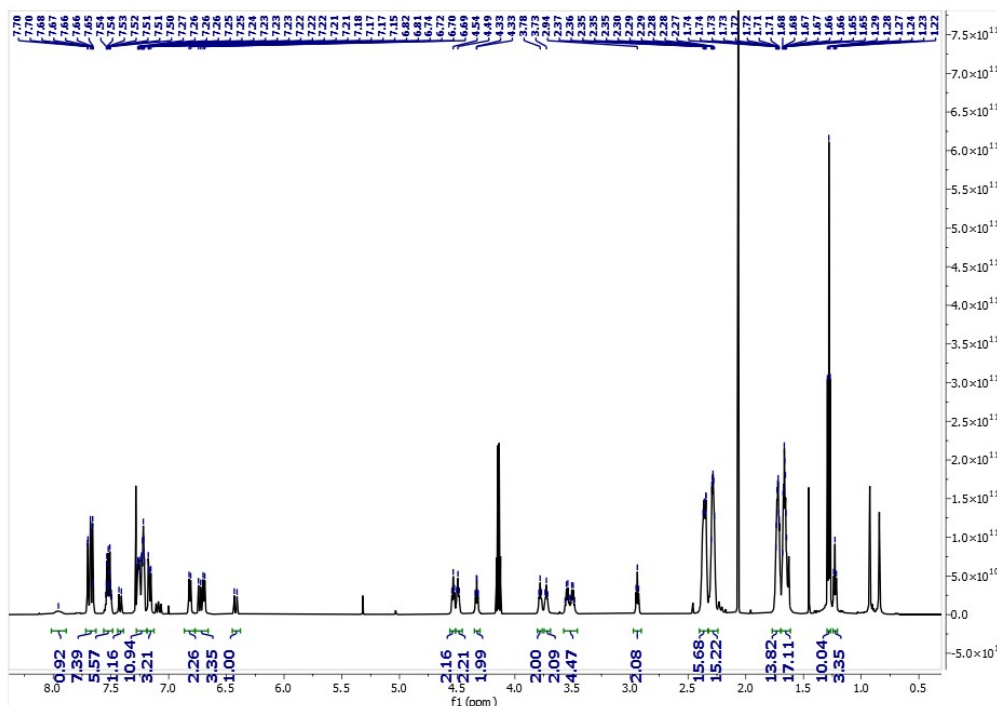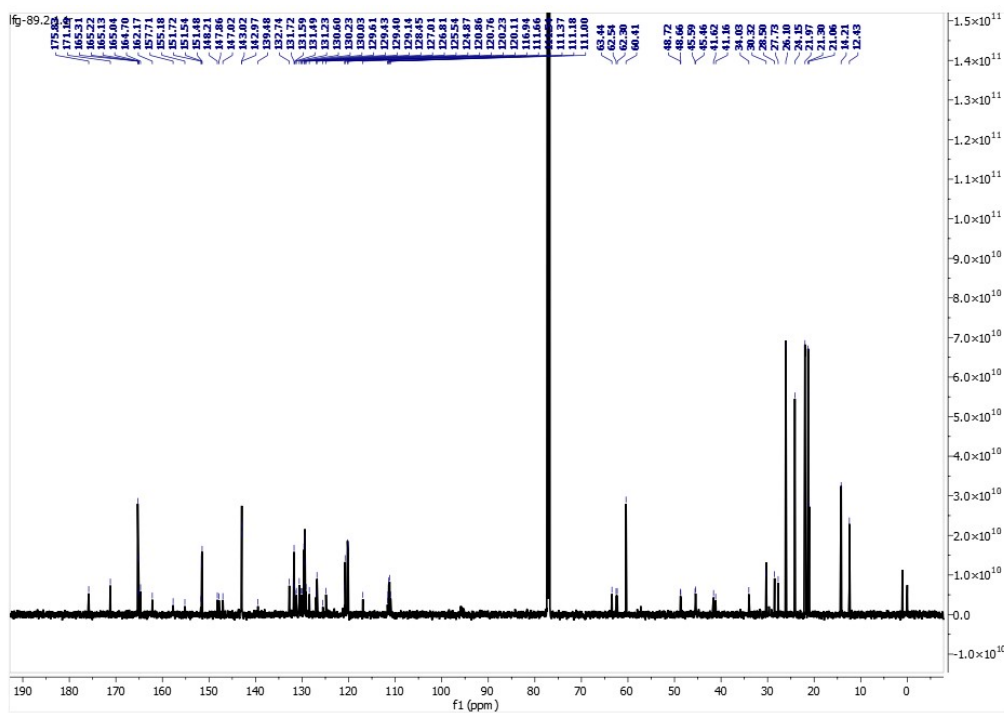

Supplement: d3ra08246f1.pdf [file d3ra08246f1.pdf]
